# Supplementary material for: Peroxo- and oxovanadium(iv) complexes with tridentate N-heterocycle ligands: synthesis, structure, and catalytic performance
Source: Royal Society of Chemistry journal article supplement (doi:10.1039/c4nj01525h), 2014-10-31
Supplement: c4nj01525h1.pdf [file c4nj01525h1.pdf]

<Journal Name> **New Journal of Chemistry**

*Peroxo- and oxovanadium (IV) complexes with tridentate  
N-heterocycle ligands: synthesis, structure, and catalytic  
performance*

5 **Xi Tong Ma, Na Xing\*, Zhi Dan Yan, Xiao Xi Zhang, Qiong Wu, Yong Heng  
Xing\***

College of Chemistry and Chemical Engineering, Liaoning Normal University, Dalian 116029,  
P.R. China  
University, Changchun 130012, P.R. China

10 \*Corresponding author: E-mail: [scarlet\\_na@163.com](mailto:scarlet_na@163.com) [xingyongheng2000@163.com](mailto:xingyongheng2000@163.com)

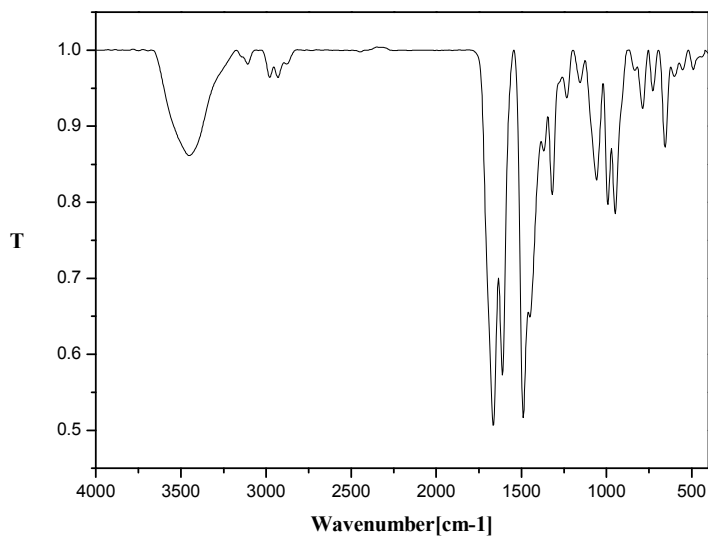

Figure S1. The IR spectra of complex 1

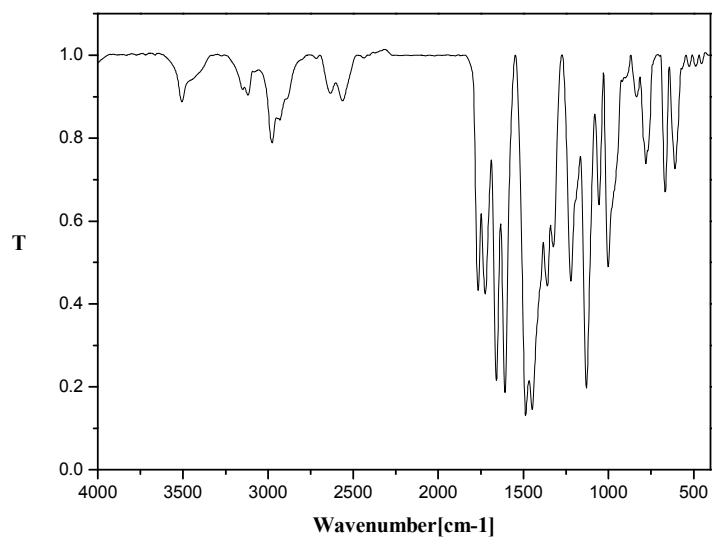

Figure S2. The IR spectra of complex 2

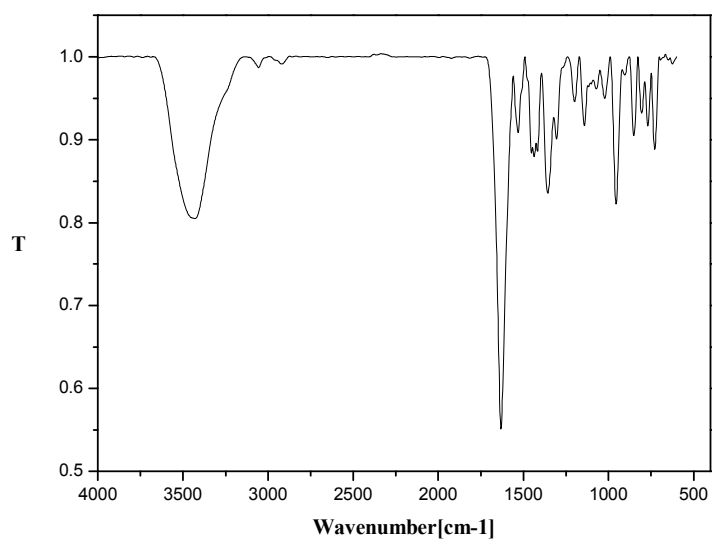

Figure S3. The IR spectra of complex 3

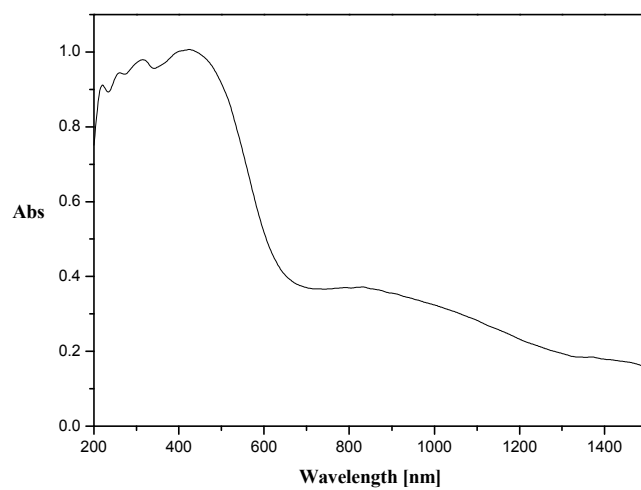

Figure S4. The UV-Vis spectra for complex 1

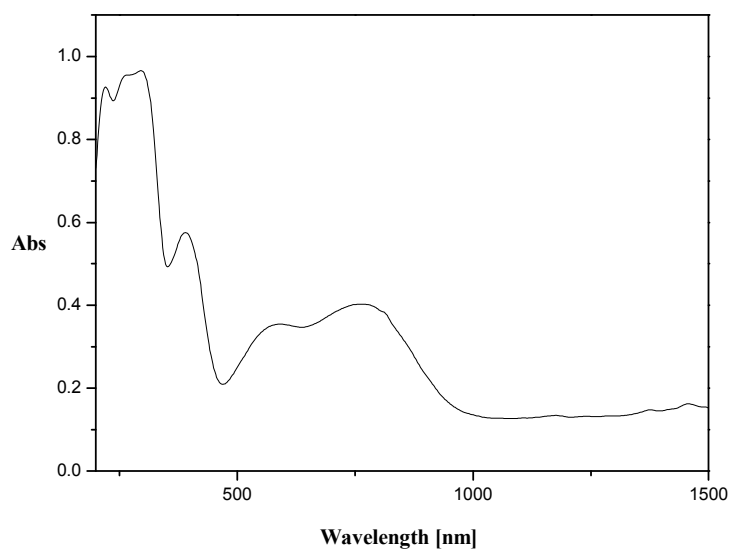

Figure S5. The UV-Vis spectra for complex 2

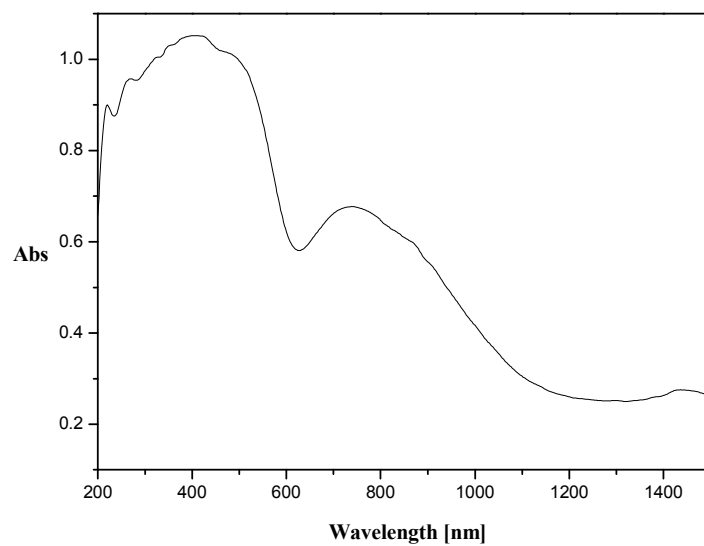

Figure S6. The UV-Vis spectra for complex 3
